# Supplementary material for: The ribosome-bound quality control complex remains associated to aberrant peptides during their proteasomal targeting and interacts with Tom1 to limit protein aggregation
Source: PubMed Central journal article supplement — Mol Biol Cell. 2017 May 1;28(9):1165–76. doi: 10.1091/mbc.E16-10-0746 (PMC5415013; doi:10.1091/mbc.e16-10-0746), 2017-05-01
Supplement: supp_E16-10-0746v1_CombinedSupMats.pdf [file supp_E16-10-0746v1_CombinedSupMats.pdf]

# Supplemental Materials

*Molecular Biology of the Cell*

Defenouillère et al.

**SUPPLEMENTAL FIGURE 1.** Tom1 cellular localization does not depend on the presence of Rqc1, Ski2 or Cdc48. WT, *rqc1* $\Delta$ , *ski2* $\Delta$  strains and strain depleted for Cdc48 for 13h, expressing Tom1-GFP fusion protein were analyzed by fluorescence microscopy. Yeast cells are shown on the right panels (Nomarski), GFP and Hoechst fluorescent signals are displayed respectively in the left and middle-left panels and merged in the middle-right panels.

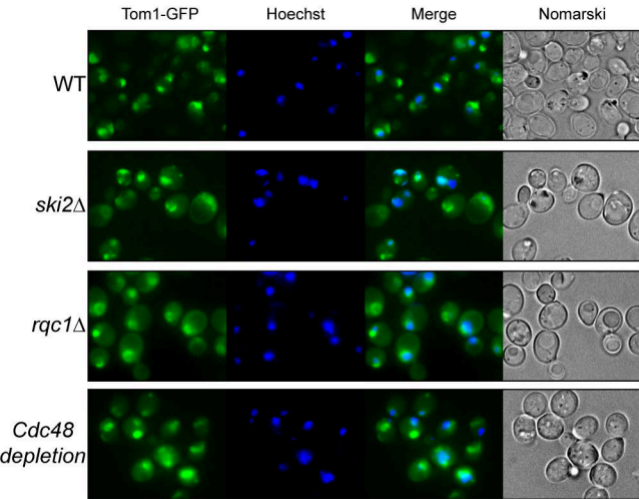

**Figure. S1**
